# Supplementary material for: Down-Regulation of Yeast Helicase Ded1 by Glucose Starvation or Heat-Shock Differentially Impairs Translation of Ded1-Dependent mRNAs
Source: MDPI journal article supplement (doi:10.3390/microorganisms9122413), 2021-11-23
Supplement: s1 [file s1]

**SUPPLEMENTARY MATERIAL FOR:**

**Down-Regulation of Yeast Helicase Ded1 by Glucose  
Starvation or Heat-Shock Differentially Impairs Translation of Ded1-  
Dependent mRNAs**

## SUPPLEMENTARY FIGURE LEGENDS

Fig. S1

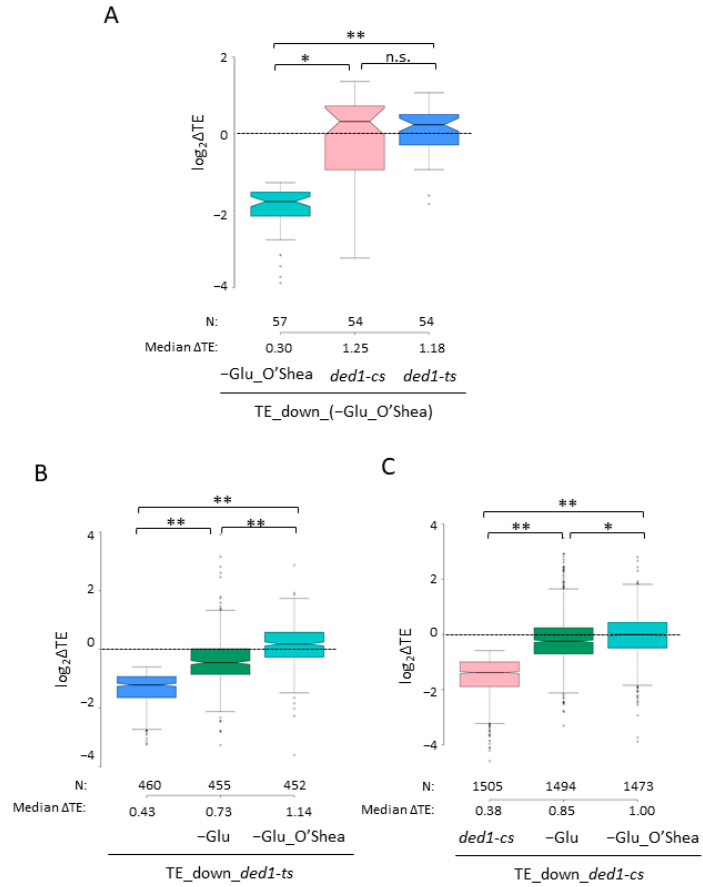

**Figure S1. Ded1-hyperdependent mRNAs generally do not exhibit TE changes as an immediate response to glucose starvation.** (A-C) Notched box plots showing  $\log_2$  fold-changes in TE ( $\log_2\Delta TE$ ) after 15 min of glucose starvation, or in response to the *ded1-ts* or *ded1-ts* mutations, for (A) 57 mRNAs showing significant TE changes after 15 min of glucose starvation (TE\_down\_(-Glu\_O'Shea)), (B) the 460 mRNAs showing  $\geq 1.5$ -fold reductions in TE in *ded1-ts* cells at FDR < 0.05, TE\_down\_ *ded1-ts* mRNAs, and (C) the 1505 mRNAs showing  $\geq 1.5$ -fold reductions in TE in *ded1-ts* cells at FDR < 0.05, TE\_down\_ *ded1-ts* mRNAs. *P*-values computed from Mann-Whitney *U*-test are given (\*,  $P < 10^{-12}$ ; \*\*,  $P < 10^{-15}$ ; n.s., not significant).

Fig. S2

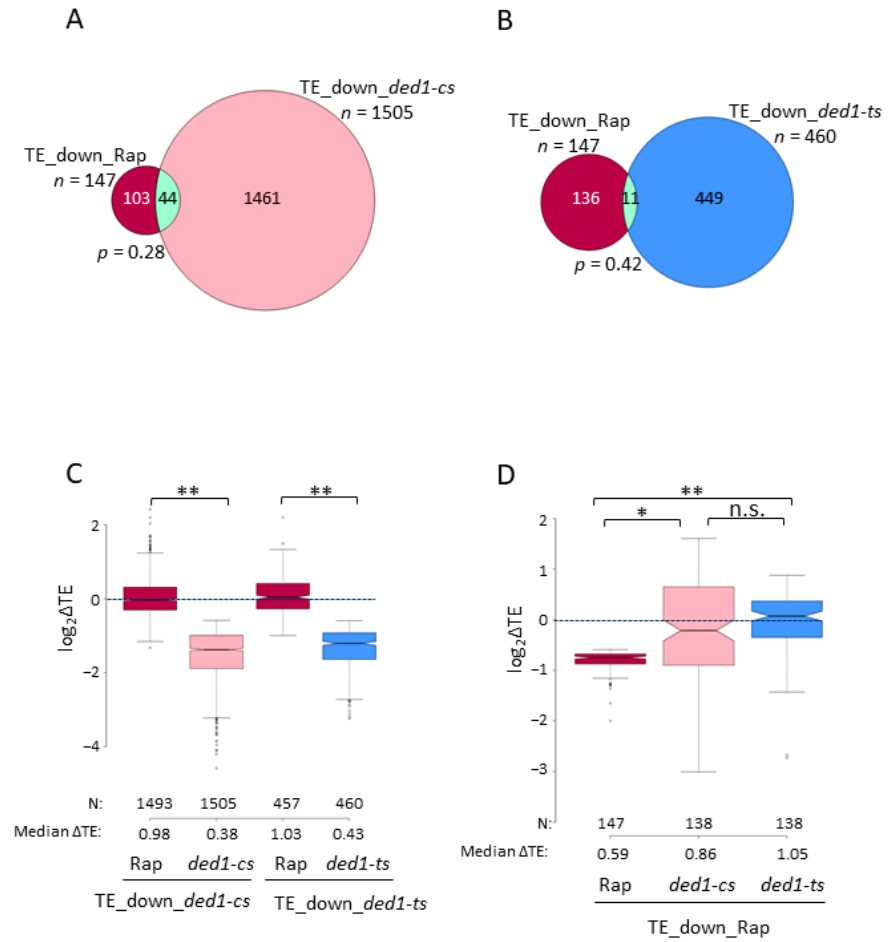

**Figure S2. Rapamycin treatment elicits translational changes largely distinct from those conferred by *ded1-ts* and *ded1-cs* mutations.** (A-B) Overlap between 147 mRNAs exhibiting  $\geq 1.5$ -fold reductions in TE at FDR < 0.05 on rapamycin treatment (TE\_down\_Rap) and either the TE\_down\_ded1-cs group (A) or the TE\_down\_ded1-ts group of mRNAs (B). (C-D) Notched box plots showing log<sub>2</sub> fold-changes in TE in response to Rap, *ded1-cs*, or *ded1-ts* for the 1505 TE\_down\_ded1-cs mRNAs (cols. 1-2) or the 460 TE\_down\_ded1-ts mRNAs (cols. 3-4). (D) Log<sub>2</sub> fold-changes in TE in response to Rap, *ded1-cs*, or *ded1-ts* for the 147 TE\_down\_Rap mRNAs. P-values computed from Mann-Whitney U-test are given (\*,  $P < 10^{-9}$ ; \*\*,  $P < 10^{-15}$ ; n.s., not significant).

Fig. S3

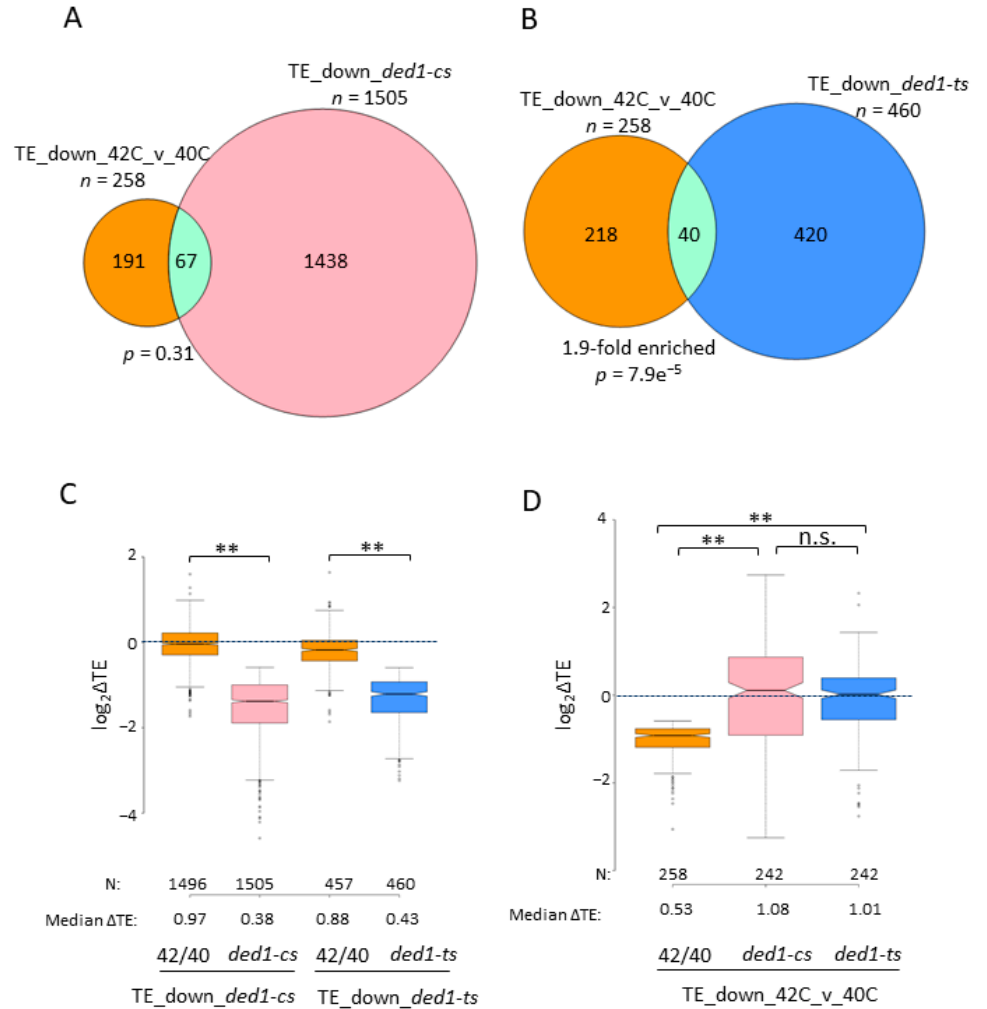

**Figure S3. A significant fraction of Ded1-hyperdependent mRNAs identified in *ded1-ts* cells is translationally down-regulated by heat-shock of WT cells at 42 °C versus 40 °C.** (A-B) Overlap between TE\_down\_42C\_v\_40C mRNAs and either TE\_down\_ded1-ts (A) or TE\_down\_ded1-ts (B) mRNAs. One outlier was omitted from the plot to expand the y-axis scale. (C) Log<sub>2</sub> fold changes in TE in response to heat-shock of WT cells at 42°C versus 40 °C (42C/40C), *ded1-ts*, or *ded1-ts* for the 1505 TE\_down\_ded1-ts mRNAs (cols. 1-2) or 460 TE\_down\_ded1-ts mRNAs (cols. 3-4). (D) Log<sub>2</sub> fold-changes in TE in response to heat-shock at 42 °C vs. 40 °C, *ded1-ts*, or *ded1-ts* for the 258 TE\_down\_42C\_v\_40C mRNAs. *P*-values computed from Mann–Whitney *U*-test are given (\*\*,  $P < 10^{-15}$ ; n.s., not significant).

Fig. S4

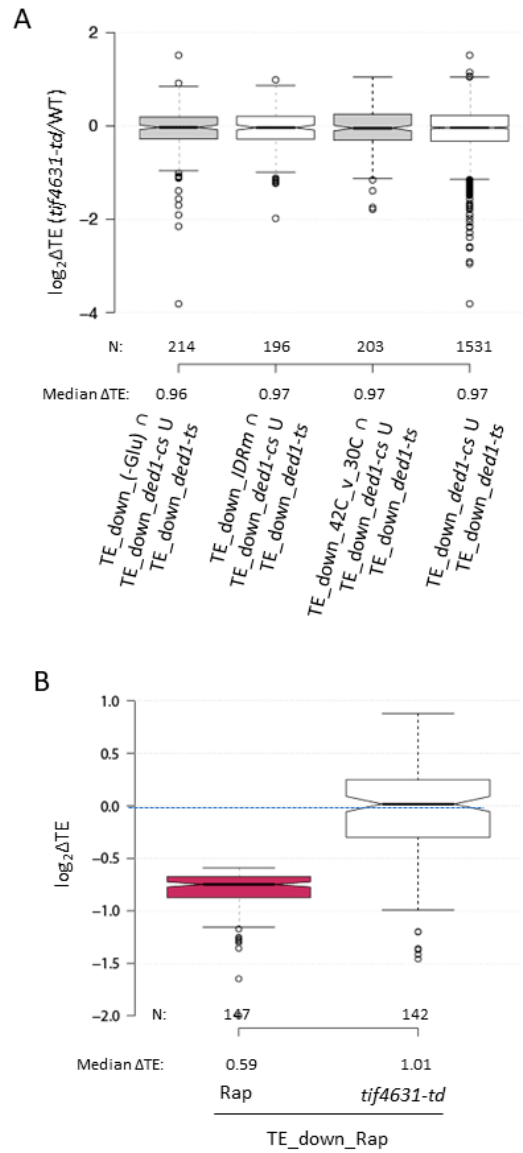

**Figure S4. Depletion of eIF4G does not preferentially reduce the TEs of subsets of Ded1-hyperdependent mRNAs translationally down-regulated by glucose starvation, the *DED1-IDRm* mutation, or heat-shock at 42°C versus 30°C, nor the mRNAs translationally downregulated by Rap. (A)** Log<sub>2</sub> fold- changes in TE conferred by depletion of eIF4G in a *tif4631-td tif4632Δ* mutant for the 1566 mRNAs showing 1.5-fold TE reductions in response to either *ded1-cs* or *ded1-ts* mutations (col. 4) or the subsets of these mRNAs that also show TE reductions in response to either glucose starvation (217 mRNAs, col. 1), the *DED1-IDRm* mutation (201 mRNAs, col. 2), or heat shock at 42°C versus 30°C (203 mRNA, col. 3). **(B)** Log<sub>2</sub> fold changes in TE conferred by Rap (col. 1) or depletion of eIF4G in a *tif4631-td tif4632Δ* mutant (col. 2) for the 147 TE\_down\_Rap mRNAs.

Fig. S5

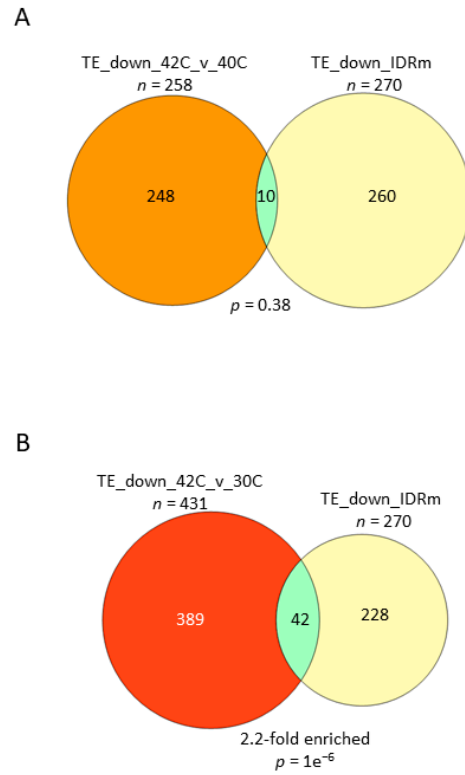

**Figure S5.** The mRNAs translationally impaired by the *DED1-IDRm* mutation are enriched for those impaired by heat-shock at 42 °C versus 30 °C but not by heat-shock at 42 °C versus 40 °C. (A–B) Overlap of TE\_down\_IDRm mRNAs with either TE\_down\_42C\_v\_40C (A) or TE\_down\_42C\_v\_30C (B) mRNAs.

**Fig. S6**

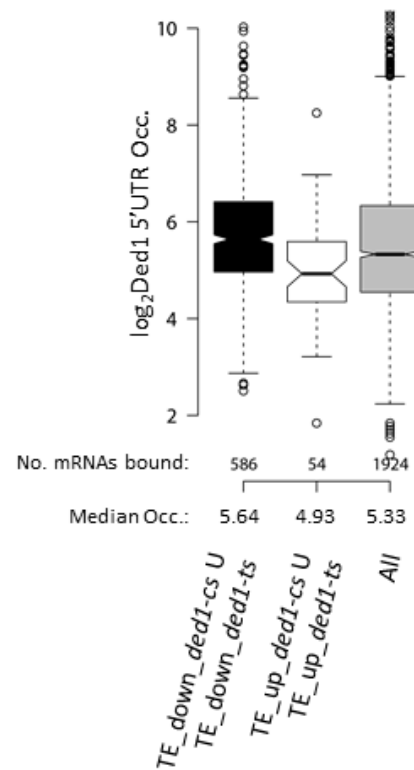

**Figure S6. Ded1-hyperdependent mRNAs exhibit greater than average 5'UTR Ded1 occupancies.** UV-crosslinking RNA immunoprecipitation (CRAC) data for Ded1 obtained from control, non-stressed cells (taken from Bresson et al. (2020)) was analyzed for the 1566 Ded1-hyperdependent mRNAs (TE\_down\_ded1-cs U TE\_down\_ded1-ts, described in Fig. 5, cols. 9-12), the 1756 Ded1-hypodependent mRNAs (showing TE increases of >1.5-fold at FDR<0.05 in either *ded1-cs* or *ded1-ts* cells), and all 5423 mRNAs analyzed in this study. The log2 reads per million in the 5'UTR or beginning of the ORF bound to Ded1 are plotted. Note that only 3% of the Ded1-hypodependent mRNAs showed detectable Ded1 binding, compared to 37% and 35% of the Ded1-hyperdependent and all mRNAs, respectively, implying a much lower median Ded1 occupancy than indicated here for the hypodependent group.

**Table S1.** Ribosome profiling datasets used in current study.

| Strain background | Growth conditions                                         | Source                                                     | GEO accession numbers                                                                                                                                                | CHX treatment | values from DESeq2 ( $\log_2\Delta TE$ ) |
|-------------------|-----------------------------------------------------------|------------------------------------------------------------|----------------------------------------------------------------------------------------------------------------------------------------------------------------------|---------------|------------------------------------------|
| $\Sigma 1278b$    | 3h Glu starvation in YP medium                            | (Vaidyanathan et al. 2014); GSE51532                       | GSM1247439<br>GSM1247440<br>GSM1247441<br>GSM1247442<br>GSM1247443<br>GSM1247444<br>GSM1247445<br>GSM1247446<br>GSM1247447<br>GSM1247448<br>GSM1247449<br>GSM1247450 | Yes           | -Glu                                     |
| BY4741            | Treatment with 12.5 nM Rap in YPD medium for 30 min       | (Nedialkova and Leidel 2015); GSE67387                     | GSM1646015<br>GSM1646016<br>GSM1646017<br>GSM1646051<br>GSM1646052<br>GSM1646053<br>GSM1646027<br>GSM1646028<br>GSM1646029<br>GSM1646057<br>GSM1646058<br>GSM1646059 | Yes           | Rap                                      |
| W303              | Heat-shock of WT for 10 min at 42°C vs 40°C in YPD medium | (Iserman et al. 2020); GSE131176 (ribo) & GSE141029 (mRNA) | GSM3765213<br>GSM3765214<br>GSM3765215<br>GSM3765216<br>GSM4192627<br>GSM4192628<br>GSM4192629<br>GSM4192630                                                         | No            | 42C/40C                                  |
| W303              | Heat-shock of WT for 10 min at 42°C vs 30°C in YPD medium | (Iserman et al. 2020); GSE131176 (ribo) & GSE141029 (mRNA) | GSM3765211<br>GSM3765212<br>GSM3765215<br>GSM3765216<br>GSM4192625<br>GSM4192626<br>GSM4192629<br>GSM4192630                                                         | No            | 42C/30C                                  |
| W303              | <i>DED1-IDR<sub>m</sub></i> vs. WT at 42°C in YPD medium  | (Iserman et al. 2020);                                     | GSM3765215<br>GSM3765216                                                                                                                                             | No            | <i>IDR<sub>m</sub></i> /WT               |

|        |                                                                                                                                                                                                                                |                                              |                                                                                                              |     |                   |
|--------|--------------------------------------------------------------------------------------------------------------------------------------------------------------------------------------------------------------------------------|----------------------------------------------|--------------------------------------------------------------------------------------------------------------|-----|-------------------|
|        |                                                                                                                                                                                                                                | GSE131176<br>(ribo) &<br>GSE141029<br>(mRNA) | GSM3765221<br>GSM3765222<br>GSM4192629<br>GSM4192630<br>GSM4192635<br>GSM4192636                             |     |                   |
| BY4741 | WT shifted to SC medium lacking glucose for 15 min                                                                                                                                                                             | (Zid and O'Shea 2014):<br>GSE56622           | GSM1365918<br>GSM1387087<br>GSM1365925<br>GSM1387091<br>GSM1365921<br>GSM1387089<br>GSM1365928<br>GSM1387093 | Yes | -Glu_O'Shea       |
| S288C  | <i>tif4631-td</i><br>( <i>tif4632Δ::kanMX6</i><br><i>P<sub>CUP1</sub>-UBI-R-DHFRts-HA-</i><br><i>tif4631-td</i> vs. WT<br>( <i>tif4632Δ::kanMX6</i><br><i>TIF4631</i> ), in SC+2%<br>raffinose, 2% galactose at<br>36°C for 2h | Zinshteyn et al. (2017):<br>GSE87614         | GSM2335482<br>GSM2335484<br>GSM2335486<br>GSM2335488<br>GSM2335490<br>GSM2335492<br>GSM2335494<br>GSM2335496 | Yes | <i>tif4631-td</i> |
| BY4741 | <i>ded1-cs</i> and WT shifted to SC medium at 15°C for 10 min                                                                                                                                                                  | (Sen et al. 2019); GSE<br>111255             | GSM3027242<br>GSM3027243<br>GSM3027244<br>GSM3027245<br>GSM3027248<br>GSM3027249<br>GSM3027250<br>GSM3027251 | Yes | <i>ded1-cs</i>    |
| BY4741 | <i>ded1-ts</i> and WT shifted to SC medium at 37°C for 2h                                                                                                                                                                      | (Sen et al. 2019); GSE<br>111255             | GSM3027254<br>GSM3027255<br>GSM3027256<br>GSM3027257<br>GSM3027260<br>GSM3027261<br>GSM3027262<br>GSM3027263 | Yes | <i>ded1-ts</i>    |
| BY4741 | <i>tif1-ts</i> and WT shifted to SC medium at 37°C for 1h                                                                                                                                                                      | (Sen et al. 2015); GSE<br>66411              | GSM1622004<br>GSM1622005<br>GSM1622006<br>GSM1622007<br>GSM1622008<br>GSM1622009<br>GSM1622010<br>GSM1622011 | Yes | <i>tif1-ts</i>    |

|        |                                                         |                              |                                                                                                              |     |              |
|--------|---------------------------------------------------------|------------------------------|--------------------------------------------------------------------------------------------------------------|-----|--------------|
|        |                                                         |                              | GSM1622012<br>GSM1622013<br>GSM1622014<br>GSM1622015<br>GSM1622016<br>GSM1622017<br>GSM1622018<br>GSM1622019 |     |              |
| BY4741 | <i>tif3Δ</i> and WT shifted to SC medium at 37°C for 1h | (Sen et al. 2016); GSE 81966 | GSM2178815<br>GSM2178816<br>GSM2178817<br>GSM2178818<br>GSM2178819<br>GSM2178820<br>GSM2178821<br>GSM2178822 | Yes | <i>tif3Δ</i> |
